# Supplementary material for: Mitral Valve Prolapse and Sudden Cardiac Death: A Systematic Review
Source: PubMed Central journal article supplement — J Am Heart Assoc. 2018 Nov 29;7(23):e010584. doi: 10.1161/JAHA.118.010584 (PMC6405538; doi:10.1161/jaha.118.010584), 2018-11-29
Supplement: JAH3-7-e010584-s001.pdf [file JAH3-7-e010584-s001.pdf]

# **Supplemental Material**

**Table S1. All Cases Included in Study.**

| Year | Author                 | Cases | Description                                                                                                                                                                                              |
|------|------------------------|-------|----------------------------------------------------------------------------------------------------------------------------------------------------------------------------------------------------------|
| 1968 | Barlow <sup>1</sup>    | 1     | Review of 90 patients with non-ejection systolic click and late systolic murmurs.<br>1 case of 39M with SCD. (iMVP)                                                                                      |
| 1970 | Trent <sup>2</sup>     | 1     | Report of 63F with MVP and SCD. (non-iMVP)                                                                                                                                                               |
| 1971 | Jeresaty <sup>3</sup>  | 1     | Review of 24 patients with mitral ballooning on angiography.<br>1 case of 62F with SCD. (iMVP)                                                                                                           |
| 1973 | Jeresaty <sup>4</sup>  | 1     | Review of 100 patients with non-ejection click or MVP on left ventriculography.<br>1 case of 44F with SCD. (iMVP)<br>1 case of 62F with SCD (repeat case).                                               |
| 1973 | Shappell <sup>5</sup>  | 1     | Report of 27F with MVP and SCD. (non-iMVP)                                                                                                                                                               |
| 1974 | Marshall <sup>6</sup>  | 1     | Report of 2 cases (27F and 36F) with MVP and SCD. (1 case iMVP and 1 case non-iMVP)<br>Case of 27F (repeat case).                                                                                        |
| 1975 | Shappell <sup>7</sup>  | 1     | Series of 4 patients with MVP.<br>1 case of 23F with VF. (iMVP)<br>2 cases (27F and 36F) of SCD (repeat cases).<br>1 case of NSVT (not included).                                                        |
| 1976 | Jeresaty <sup>8</sup>  | 2     | Summary of 12 cases of MVP and SCD.<br>2 cases (39F and 40M) included. (both iMVP)<br>7 cases previously reported.<br>3 cases of personal communication without individual age or gender (not included). |
| 1976 | Kleid <sup>9</sup>     | 1     | Report of 38F with MVP and SCD. (iMVP)                                                                                                                                                                   |
| 1976 | Ritchie <sup>10</sup>  | 1     | Report of 56M with MVP and VF. (non-iMVP)                                                                                                                                                                |
| 1976 | Winkle <sup>11</sup>   | 5     | Series of 7 patients with MVP and VAs.<br>3 cases with VF and 2 cases with VT. (4 cases iMVP and 1 case non-iMVP)<br>2 cases excluded (1 with unmonitored cardiac arrest and 1 NSVT).                    |
| 1977 | Cobbs <sup>12</sup>    | 1     | Report of 39F with MVP and VF. (iMVP)                                                                                                                                                                    |
| 1977 | Mills <sup>13</sup>    | 2     | Follow-up of 53 patients with MVP.<br>1 case of 58M with SCD. (non-iMVP)<br>1 case of 26F with VF. (iMVP)                                                                                                |
| 1978 | Davies <sup>14</sup>   | 13    | Review of 90 cases of MVP at autopsy.<br>13 cases with MVP and SCD (12 cases iMVP and 1 case non-iMVP).                                                                                                  |
| 1979 | Forbes <sup>15</sup>   | 1     | Report of 25F with MVP and VF on anaesthesia induction. (non-iMVP)                                                                                                                                       |
| 1979 | Watts <sup>16</sup>    | 1     | Report of 26F with MVP and VF. (iMVP)                                                                                                                                                                    |
| 1980 | Anderson <sup>17</sup> | 2     | Report of 2 cases (both 21F) with MVP and SCD. (both iMVP)                                                                                                                                               |
| 1980 | Bennett <sup>18</sup>  | 1     | Report of 15F with MVP and TDP. (iMVP)                                                                                                                                                                   |
| 1980 | Mair <sup>19</sup>     | 3     | Series of 3 cases (25F, 29F and 35F) with MVP and SCD. (all iMVP)                                                                                                                                        |
| 1980 | Mautner <sup>20</sup>  | 2     | Review of 22 patients with MVP and PVCs.<br>1 case of 51F with VF. (iMVP)<br>1 case of 50M with VT during anesthesia induction. (iMVP)                                                                   |
| 1981 | Bharati <sup>21</sup>  | 1     | Report of 45M with MVP and SCD. (iMVP)                                                                                                                                                                   |
| 1981 | Salmela <sup>22</sup>  | 1     | Report of 27M with MVP and SCD. (non-iMVP)                                                                                                                                                               |
| 1982 | Noneman <sup>23</sup>  | 1     | Report of 29M with MVP and VF. (iMVP)                                                                                                                                                                    |
| 1982 | Vesterby <sup>24</sup> | 3     | Series of 3 cases (23F, 68M, 55M) with MVP and SCD. (1 case iMVP and 2 cases non-iMVP)                                                                                                                   |
| 1982 | Virmani <sup>25</sup>  | 1     | Review of 30 autopsies in joggers.<br>1 case of 27M with MVP and SCD. (iMVP)                                                                                                                             |
| 1983 | Bharati <sup>26</sup>  | 2     | Series of 3 cases of SCD in teenagers.<br>2 cases (17M and 19F) with MVP. (both iMVP)                                                                                                                    |

|      |                               |    |                                                                                                                                         |
|------|-------------------------------|----|-----------------------------------------------------------------------------------------------------------------------------------------|
| 1983 | Chesler <sup>27</sup>         | 14 | Series of 14 cases of MVP and SCD. (non-iMVP)                                                                                           |
| 1983 | Conklin <sup>28</sup>         | 1  | Report of 22F with MVP and VT during labor. (iMVP)                                                                                      |
| 1983 | Morady <sup>29</sup>          | 2  | Series of 31 patients with VAs undergoing EPS.<br>2 patients (28F and 39F) with MVP and VF. (both iMVP)                                 |
| 1984 | Kempf <sup>30</sup>           | 1  | Series of 27 cases with SCD on ambulatory ECG monitoring.<br>1 case of 31F with MVP. (non-iMVP)                                         |
| 1984 | Pocock <sup>31</sup>          | 1  | Report of 24F with MVP and SCD. (non-iMVP)                                                                                              |
| 1985 | Andre-Fouet <sup>32</sup>     | 1  | Report of 19M with MVP and SCD. (iMVP)                                                                                                  |
| 1985 | Rosenthal <sup>33</sup>       | 5  | Series of 20 patients with MVP and VAs.<br>5 patients with VF. (all iMVP)                                                               |
| 1985 | Sakuma <sup>34</sup>          | 1  | Report of 54M with MVP, coronary vasospasm and VF. (non-iMVP)                                                                           |
| 1986 | Casthely <sup>35</sup>        | 1  | Report of 7M with MVP and VF during anaesthesia induction. (iMVP)                                                                       |
| 1986 | Higgins <sup>36</sup>         | 1  | Report of 36F with MVP and VT. (non-iMVP)                                                                                               |
| 1986 | Hoffman <sup>37</sup>         | 1  | Report of 32F with MVP and VF. (iMVP)                                                                                                   |
| 1987 | Broustet <sup>38</sup>        | 1  | Report of 28F with MVP and SCD. (non-iMVP)                                                                                              |
| 1988 | Goldhammer <sup>39</sup>      | 1  | Report of 46M with MVP and asystole. (iMVP)                                                                                             |
| 1988 | Scala-Barnett <sup>40</sup>   | 4  | Series of 4 cases of MVP and SCD. (2 cases iMVP and 2 cases non-iMVP)                                                                   |
| 1988 | Strasberg <sup>41</sup>       | 1  | Report of 27M with MVP and VF. (iMVP)                                                                                                   |
| 1988 | Vlay <sup>42</sup>            | 1  | Report of 24F with MVP and SCD. (iMVP)                                                                                                  |
| 1989 | Abraham <sup>43</sup>         | 1  | Report of 33F with MVP and asystole during anesthesia. (iMVP)                                                                           |
| 1989 | Topaz <sup>44</sup>           | 2  | Series of 22 patients with cardiac arrest.<br>2 patients [19M (also anomalous RCA) and 28M] with MVP. (1 case iMVP and 1 case non-iMVP) |
| 1989 | Martini <sup>45</sup>         | 2  | Series of 6 cases with VF.<br>2 cases (14F and 35M) with MVP. (both iMVP)                                                               |
| 1990 | Boudoulas <sup>46</sup>       | 9  | Series of 9 patients with MVP and cardiac arrest. (8 cases iMVP and 1 case non-iMVP)                                                    |
| 1990 | Corrado <sup>47</sup>         | 2  | Series of 22 athletes with SCD.<br>2 cases (17F and 23M) with MVP. (both iMVP)                                                          |
| 1990 | Nelson-Piercy <sup>48</sup>   | 1  | Report of 67M with MVP, anomalous RCA and VF. (non-iMVP)                                                                                |
| 1990 | Sadaniantz <sup>49</sup>      | 0  | Report of 27M with MVP and SCD (repeat case).                                                                                           |
| 1991 | Dollar <sup>50</sup>          | 15 | Review of 56 cases of MVP at autopsy.<br>15 cases of SCD related to MVP. (14 cases iMVP and 1 case non-iMVP)                            |
| 1993 | Vohra <sup>51</sup>           | 2  | Series of 7 patients with MVP and VAs.<br>2 cases (28M and 45M) with SCD. (both non-iMVP)                                               |
| 1995 | Martini <sup>52</sup>         | 1  | Report of 42F with MVP, ARVC and SCD. (non-iMVP)                                                                                        |
| 1997 | Moritz <sup>53</sup>          | 1  | Report of 6F with MVP and VF during anaesthesia induction. (iMVP)                                                                       |
| 1997 | Wilde <sup>54</sup>           | 1  | Report of 34M with MVP and VF. (iMVP)                                                                                                   |
| 1998 | Ronneberger <sup>55</sup>     | 1  | Report of 8M with MVP and SCD. (non-iMVP)                                                                                               |
| 2000 | Nolte <sup>56</sup>           | 1  | Report of 26F with MVP, diffuse CAD due to PXE and SCD. (non-iMVP)                                                                      |
| 2001 | Cannon <sup>57</sup>          | 1  | Report of 25F with MVP and SCD. (iMVP)                                                                                                  |
| 2003 | Abello <sup>58</sup>          | 1  | Report of 28F with MVP and VF during pregnancy. (iMVP)                                                                                  |
| 2003 | Ciancarmerla <sup>59</sup>    | 1  | Report of 49M with MVP and SCD. (iMVP)                                                                                                  |
| 2003 | Nishida <sup>60</sup>         | 1  | Series of 3 cases of SCD and alcohol abuse.<br>1 case of 37F with MVP. (non-iMVP)                                                       |
| 2004 | Chirachariyavej <sup>61</sup> | 1  | Report of 38M with MVP and SCD. (iMVP)                                                                                                  |
| 2004 | Frassati <sup>62</sup>        | 3  | Series of 14 cases of SCD in psychiatric patients.<br>3 cases (22M, 51M and 57M) with MVP. (1 case iMVP and 2 cases non-iMVP)           |
| 2005 | Zeidan <sup>63</sup>          | 1  | Report of 21F with MVP and VF during anaesthesia reversal. (iMVP)                                                                       |
| 2007 | Anders <sup>64</sup>          | 6  | Series of 6 cases of MVP and SCD. (iMVP)                                                                                                |
| 2007 | Kesavan <sup>65</sup>         | 1  | Report of 75F with MVP, CAD and VT. (non-iMVP)                                                                                          |

|      |                          |   |                                                                                                                         |
|------|--------------------------|---|-------------------------------------------------------------------------------------------------------------------------|
| 2007 | Knackstedt <sup>66</sup> | 1 | Report of a 54M with MVP and VF. (iMVP)                                                                                 |
| 2010 | Franchitto <sup>67</sup> | 1 | Report of 25F with MVP and SCD. (iMVP)                                                                                  |
| 2010 | Oliviera <sup>68</sup>   | 1 | Report of 57F with MVP and SCD (also heart failure on trastuzumab). (non-iMVP)                                          |
| 2011 | Rordorf <sup>69</sup>    | 1 | Report of 32F with MVP and VF (also DCM post-partum with PJRT). (non-iMVP)                                              |
| 2014 | Abbadj <sup>70</sup>     | 1 | Report of 26F with MVP and VF. (iMVP)                                                                                   |
| 2014 | Rajani <sup>71</sup>     | 1 | Report of 27F with MVP and TDP. (iMVP)                                                                                  |
| 2015 | Lin <sup>72</sup>        | 1 | Report of 30F with MVP and VT during pregnancy. (iMVP)                                                                  |
| 2015 | Desai <sup>73</sup>      | 1 | Report of 55M with MVP and SCD. (iMVP)                                                                                  |
| 2015 | Fais <sup>74</sup>       | 1 | Report of 47F with MVP and SCD. (iMVP)                                                                                  |
| 2016 | Ahmed <sup>75</sup>      | 1 | Report of 45M with MVP and VT. (iMVP)                                                                                   |
| 2016 | Vaidya <sup>76</sup>     | 5 | Series of 5 patients with MVP, ICD and history of MV surgery (1 case also had HCM). (2 cases iMVP and 3 cases non-iMVP) |
| 2017 | Cacko <sup>77</sup>      | 1 | Report of 28F with MVP and VF. (iMVP)                                                                                   |
| 2017 | Martini <sup>78</sup>    | 1 | Report of 58M with MVP and VF (also Brugada ECG). (non-iMVP)                                                            |
| 2017 | Saha <sup>79</sup>       | 1 | Report of 26F with MVP and VF during pregnancy. (iMVP)                                                                  |

SCD, sudden cardiac death; MVP, mitral valve prolapse; VF, ventricular fibrillation; NSVT, non-sustained ventricular tachycardia; VAs, ventricular arrhythmias; EPS, electrophysiology study; VT, ventricular tachycardia; TDP, torsade de pointes; PVCs, premature ventricular complexes; RCA, right coronary artery; ARVC, arrhythmogenic right ventricular cardiomyopathy; PXE, pseudoxanthoma elasticum; CAD, coronary artery disease; DCM, dilated cardiomyopathy; PJRT, persistent junctional reciprocating tachycardia, ICD, implantable cardiac defibrillator; MV, mitral valve; HCM, hypertrophic cardiomyopathy

**Table S2. Predictors of Ventricular Arrhythmias or Sudden Cardiac Death.**

|                   | Author                  | Year | Study                      | N (% Female) | Age range | Study population         | Diagnostic criteria    | Predictor/association                    | Outcome/Endpoint                                                               |
|-------------------|-------------------------|------|----------------------------|--------------|-----------|--------------------------|------------------------|------------------------------------------|--------------------------------------------------------------------------------|
| <b>Clinical</b>   |                         |      |                            |              |           |                          |                        |                                          |                                                                                |
|                   | Gaffney <sup>80</sup>   | 1979 | Prospective Cohort         | 19 (100)*    | 19-46     | MVP                      | M-mode or auscultation | Higher heart rate<br>Lower cardiac index | Clinical severity (combination of symptoms and VAs)                            |
|                   | Puddu <sup>81</sup>     | 1983 | Prospective Cohort         | 15 (67)      | NR        | MVP                      | Echo (NS)              | Plasma catecholamine level               | QTc (supine)                                                                   |
|                   | Snieszek <sup>82</sup>  | 1992 | Prospective Cohort         | 53 (58)      | 19-52     | MVP                      | Echo (LAX)             | Adrenaline excretion                     | Complex VAs (Lown grade ≥3)                                                    |
|                   | Zuppiroli <sup>83</sup> | 1994 | Prospective Cohort         | 119 (47)     | 12-78     | MVP                      | Echo (LAX)             | Female                                   | Complex VAs (Lown grade ≥3) <sup>†</sup>                                       |
|                   | Babuty <sup>84</sup>    | 1994 | Prospective Cohort         | 58 (50)      | NR        | MVP                      | Echo (LAX or A4C)      | Age (older)                              | Complex VAs (Lown grade ≥3)                                                    |
|                   | Naksuk <sup>85</sup>    | 2016 | Retrospective Cohort       | 32 (53)      | NR        | BiMVP with MV surgery    | N/A                    | Age (younger)                            | Reduction in PVCs post MVR in BiMVP                                            |
|                   | Fulton <sup>86</sup>    | 2017 | Retrospective Cohort       | 18 (61)      | NR        | MVP                      | Echo (LAX)             | Female                                   | PVCs from PM                                                                   |
| <b>Electrical</b> |                         |      |                            |              |           |                          |                        |                                          |                                                                                |
|                   | Campbell <sup>87</sup>  | 1976 | Prospective Cohort         | 20 (65)      | 12-61     | MVP                      | Auscultation           | Inferolateral T-wave changes             | VT (>100bpm for 3 beats) or VF changes                                         |
|                   | Babuty <sup>84</sup>    | 1994 | Prospective Cohort         | 58 (50)      | NR        | MVP                      | Echo (LAX or A4C)      | Late potentials                          | Non-sustained VT (≥3 beats and <30 seconds)                                    |
|                   | Bobkowski <sup>88</sup> | 2002 | Prospective Cohort         | 151 (77)*    | 5-18      | MVP                      | Echo (NS)              | Late potentials                          | VAs (Lown grade ≥1)<br>Non-sustained VT (>120bpm for ≥4 beats and <30 seconds) |
|                   | Akcay <sup>89</sup>     | 2010 | Retrospective Case control | 60 (72)      | NR        | MVP (with vs without VT) | Echo (NS)              | QTc dispersion                           | VT (>120bpm for ≥3 beats) <sup>†</sup>                                         |
| <b>Imaging</b>    |                         |      |                            |              |           |                          |                        |                                          |                                                                                |
|                   | Shah <sup>90</sup>      | 1982 | Retrospective Cohort       | 88 (60)      | 12-84     | MVP                      | M-mode                 | MR                                       | Complex VAs (Lown grade ≥3)                                                    |
|                   | Nishimura <sup>91</sup> | 1985 | Prospective Cohort         | 237 (60)     | 10-69     | MVP                      | Echo (NS)              | Redundant leaflets                       | Sudden death <sup>†</sup>                                                      |
|                   | Kligfield <sup>92</sup> | 1985 | Prospective Cohort         | 80 (65)*     | 19-72     | MVP                      | Echo (NS)              | MR                                       | >1% PVC frequency<br>Exercise induced PVCs and VT                              |

|  |                          |      |                            |             |       |                          |                   |                                                          |                                                                       |
|--|--------------------------|------|----------------------------|-------------|-------|--------------------------|-------------------|----------------------------------------------------------|-----------------------------------------------------------------------|
|  |                          |      |                            |             |       |                          |                   |                                                          | Complex VAs (Lown grade 4)                                            |
|  | Sanfilippo <sup>93</sup> | 1989 | Retrospective Cohort       | 22 (55)*    | NR    | MVP                      | Echo (LAX or A4C) | Anterior leaflet thickness<br>MR<br>Leaflet displacement | VAs ( $\geq 10$ PVCs/hr or NSVT at $\geq 100$ bpm for $\geq 3$ beats) |
|  | Zuppiroli <sup>83</sup>  | 1994 | Prospective Cohort         | 119 (47)    | 12-78 | MVP                      | Echo (LAX)        | Anterior leaflet thickness                               | Complex VAs (Lown grade $\geq 3$ )†                                   |
|  | Babuty <sup>84</sup>     | 1994 | Prospective Cohort         | 58 (50)     | NR    | MVP                      | Echo (LAX or A4C) | MR                                                       | Complex VAs (Lown grade $\geq 3$ ) on Holter and exercise test        |
|  | Zouridakis <sup>94</sup> | 2001 | Prospective Cohort         | 89 (71)     | NR    | MVP                      | Echo (LAX or A4C) | MVP degree<br>Anterior leaflet thickness                 | QT dispersion†                                                        |
|  | Turker <sup>95</sup>     | 2010 | Prospective Cohort         | 58 (55)     | 16-68 | MVP                      | Echo (LAX)        | Moderate-severe MR                                       | VAs (Lown grade $\geq 1$ )†                                           |
|  | Carmo <sup>96</sup>      | 2010 | Retrospective Cohort       | 38 (47)     | NR    | MVP                      | Echo (LAX)        | Mitral annular disjunction                               | Non-sustained VT                                                      |
|  | Han <sup>97</sup>        | 2010 | Retrospective Cohort       | 16 (44)*    | NR    | MVP                      | Echo (NS)         | LGE in PM                                                | Complex VAs (Lown grade $\geq 4$ )                                    |
|  | Akcay <sup>89</sup>      | 2010 | Retrospective Case control | 60 (72)     | NR    | MVP (with vs without VT) | Echo (NS)         | Anterior leaflet length                                  | VT ( $>120$ bpm for $\geq 3$ beats)†                                  |
|  | Sriram <sup>98</sup>     | 2013 | Retrospective Cohort       | 24 (67)     | 5-60  | Idiopathic OHCA          | Echo (NS)         | BiMVP                                                    | Appropriate ICD therapies at follow-up                                |
|  | Basso <sup>99</sup>      | 2015 | Prospective Cohort         | 44 (66)     | 24-64 | MVP                      | Echo (LAX)        | LGE (PM, inferobasal wall and total percentage)          | Complex VA (Lown grade $\geq 4$ b or VF)                              |
|  | Nordhues <sup>100</sup>  | 2016 | Retrospective Case control | 11338 (43)* | NR    | BiMVP vs SiMVP           | Echo (NS)         | BiMVP                                                    | All-cause mortality (lower in BiMVP)                                  |
|  | Bui <sup>101</sup>       | 2017 | Retrospective Cohort       | 32 (34)*    | NR    | MVP                      | CMR               | Myocardial T1 time                                       | Complex VAs (Lown grade $\geq 3$ )                                    |
|  | Fulton <sup>86</sup>     | 2017 | Retrospective Cohort       | 18 (61)     | NR    | MVP                      | Echo or CMR       | BiMVP<br>LGE in PM                                       | PVCs from PM                                                          |

A4C, apical 4 chamber; bpm, beats per minute; BiMVP, bileaflet MVP; ICD, implantable cardiac defibrillator; LAX, long axis; LGE, late gadolinium enhancement; NR, not reported; NS, not specified; OHCA, out of hospital cardiac arrest; PM, papillary muscle; SiMVP, single leaflet MVP.

\*Studies also included normal control groups which are not presented

†Significant result on multivariate analysis; significant univariable predictors not presented

### Supplemental References:

1. Barlow J, Bosman C, Pocock W, Marchand P. Late systolic murmurs and non-ejection (" mid-late") systolic clicks. An analysis of 90 patients. *British Heart Journal*. 1968;30:203.
2. Trent J, Adelman A, Wigle E, Silver M. Morphology of a prolapsed posterior mitral valve leaflet. *American Heart Journal*. 1970;79:539-543.
3. Jeresaty RM. Ballooning of the mitral valve leaflets: Angiographic study of 24 patients. *Radiology*. 1971;100:45-52.
4. Jeresaty RM. Mitral valve prolapse-click syndrome. *Progress in Cardiovascular Diseases*. 1973;15:623-652.
5. Shappell SD, Marshall CE, Brown RE, Bruce TA. Sudden death and the familial occurrence of mid-systolic click, late systolic murmur syndrome. *Circulation*. 1973;48:1128-1134.
6. Marshall CE, Shappell SD. Sudden death in association with the ballooning posterior mitral leaflet syndrome. *Journal of Forensic Science*. 1974;19:715-722.
7. Shappell SD, Marshall CE. Ballooning posterior leaflet syndrome: Syncope and sudden death. *Archives of Internal Medicine*. 1975;135:664-667.
8. Jeresaty RM. Sudden death in the mitral valve prolapse-click syndrome. *The American Journal of Cardiology*. 1976;37:317-318.
9. Kleid JJ. Sudden death and the floppy mitral valve syndrome. *Angiology*. 1976;27:734-737.
10. Ritchie JL, Hammermeister KE, Kennedy JW. Refractory ventricular tachycardia and fibrillation in a patient with the prolapsing mitral leaflet syndrome: Successful control with overdrive pacing. *The American Journal of Cardiology*. 1976;37:314-316.
11. Winkle RA, Lopes MG, Popp RL, Hancock EW. Life-threatening arrhythmias in the mitral valve prolapse syndrome. *The American Journal of Medicine*. 1976;60:961-967.

12. Cobbs BW, King SB. Ventricular buckling: A factor in the abnormal ventriculogram and peculiar hemodynamics associated with mitral valve prolapse. *American Heart Journal*. 1977;93:741-758.
13. Mills P, Rose J, Hollingsworth J, Amara I, Craige E. Long-term prognosis of mitral-valve prolapse. *New England Journal of Medicine*. 1977;297:13-18.
14. Davies M, Moore B, Braimbridge M. The floppy mitral valve. Study of incidence, pathology, and complications in surgical, necropsy, and forensic material. *British Heart Journal*. 1978;40:468-481.
15. Forbes R, Morton G. Ventricular fibrillation in a patient with unsuspected mitral valve prolapse and a prolonged qt interval. *Canadian Anaesthetists' Society Journal*. 1979;26:424-427.
16. Watts E, Nomeir A-m, Stevenson JS, Newsome AR. Prevention of recurrent ventricular fibrillation by atrial pacemaker and sympathectomy. *Southern Medical Journal*. 1979;72:614-616.
17. Anderson RC. Idiopathic mitral valve prolapse and sudden death. *American Heart Journal*. 1980;100:941-942.
18. Bennett KR. Torsade de pointes and mitral valve prolapse. *The American Journal of Cardiology*. 1980;45:715.
19. Mair W. Sudden death in young females with floppy mitral valve syndrome. *Internal Medicine Journal*. 1980;10:221-223.
20. Mautner RK, Katz GE, Kelly W, Phillips JH. Chronic ventricular dysrhythmia in the mitral valve prolapse syndrome: Frequency and clinical significance of ventricular site of origin. *Southern Medical Journal*. 1980;73:1229-1233.
21. Bharati S, Granston AS, Liebson PR, Loeb HS, Rosen KM, Lev M. The conduction system in mitral valve prolapse syndrome with sudden death. *American Heart Journal*. 1981;101:667-670.

22. Salmela PI, Ikäheimo M, Juustila H. Fatal ventricular fibrillation after treatment with digoxin in a 27-year-old man with mitral leaflet prolapse syndrome. *British Heart Journal*. 1981;46:338-341.
23. Noneman JW, Batenhorst RL, Jones MR, Garrett ER, Foster TS. Treatment of refractory ventricular arrhythmias: High dose parenteral and oral bretylium tosylate. *Chest*. 1982;81:517-519.
24. Vesterby A, Bjerregaard P, Gregersen M, Fode K. Sudden death in mitral valve prolapse: Associated accessory atrioventricular pathways. *Forensic Science International*. 1982;19:125-133.
25. Virmani R, Robinowitz M, McAllister HA. Nontraumatic death in joggers: A series of 30 patients at autopsy. *The American Journal of Medicine*. 1982;72:874-882.
26. Bharati S, Bauernfeind R, Miller LB, Strasberg B, Lev M. Sudden death in three teenagers: Conduction system studies. *Journal of the American College of Cardiology*. 1983;1:879-886.
27. Chesler E, King RA, Edwards JE. The myxomatous mitral valve and sudden death. *Circulation*. 1983;67:632-639..
28. Conklin KA, Ziadlou-rad F. Bupivacaine cardiotoxicity in a pregnant patient with mitral valve prolapse. *Anesthesiology*. 1983;58:596-596
29. Morady F, Scheinman MM, Hess DS, Chen R, Stanger P. Clinical characteristics and results of electrophysiologic testing in young adults with ventricular tachycardia or ventricular fibrillation. *American Heart Journal*. 1983;106:1306-1314.
30. Kempf FC, Josephson ME. Cardiac arrest recorded on ambulatory electrocardiograms. *The American Journal of Cardiology*. 1984;53:1577-1582.
31. Pocock WA, Bosman CK, Chesler E, Barlow JB, Edwards JE. Sudden death in primary mitral valve prolapse. *American Heart Journal*. 1984;107:378-382.

32. André-Foueët X, Tabib A, Jean-Louis P, Anne D, Dutertre P, Gayet C, de Mahenge AH, Loire R, Pont M. Mitral valve prolapse, wolff-parkinson-white syndrome, his bundle sclerosis and sudden death. *The American Journal of Cardiology*. 1985;56:700.
33. Rosenthal ME, Hamer A, Gang ES, Oseran DS, Mandel WJ, Peter T. The yield of programmed ventricular stimulation in mitral valve prolapse patients with ventricular arrhythmias. *American Heart Journal*. 1985;110:970-976.
34. Sakuma T, Kakihana M, Togo T, Matsuda M, Ogawa T, Sugishita Y, Ito I, Kurusu T. Mitral valve prolapse syndrome with coronary artery spasm: A possible cause of recurrent ventricular tachyarrhythmia. *Clinical Cardiology*. 1985;8:306-308.
35. Casthely PA, Dluzneski J, Resurreccion MA, Kleopoulos NN, Redko V. Ventricular fibrillation during general anaesthesia in a seven-year-old patient with mitral valve prolapse. *Canadian Journal of Anesthesia*. 1986;33:795-798.
36. Higgins JR. Automatic burst extrastimulus pacemaker to treat recurrent ventricular tachycardia in a patient with mitral valve prolapse: More than 2,000 documented successful tachycardia terminations. *Journal of the American College of Cardiology*. 1986;8:446-450.
37. Hoffmann A, Wenk M, Follath F. Exercise-induced ventricular tachycardia as a manifestation of flecainide toxicity. *International Journal of Cardiology*. 1986;11:353-355.
38. Broustet J, Douard H, Mora B. Exercise testing in arrhythmias of idiopathic mitral valve prolapse. *European Heart Journal*. 1987;8:37-42.
39. Goldhammer E, Malouf S, Hassan A, Abinader E. Ventricular asystole and syncope in mitral valve prolapse: Case report. *Journal of Cardiopulmonary Rehabilitation and Prevention*. 1988;8:324-325.
40. Scala-Barnett DM, Donoghue E. Sudden death in mitral valve prolapse. *Journal of Forensic Science*. 1988;33:84-91.
41. Strasberg B, Caspi A, Kusniec J, Lewin RF, Sclarovsky S, Agmon J. Ventricular fibrillation in a patient with 'silent' mitral valve prolapse. *Cardiology*. 1988;75:149-153.

42. Vlay SC. Morte d'amour with subsequent electrophysiologic studies. *American Journal of Cardiology*. 1988;61:1364.
43. Abraham ZA, Lees DE. Two cardiac arrests after needle punctures in a patient with mitral valve prolapse: Psychogenic? *Anesthesia & Analgesia*. 1989;69:126-128.
44. Topaz O, Perin E, Cox M, Mallon SM, Castellanos A, Myerburg RJ. Young adult survivors of sudden cardiac arrest: Analysis of invasive evaluation of 22 subjects. *American Heart Journal*. 1989;118:281-287.
45. Martini B, Nava A, Thiene G, Buja GF, Canciani B, Scognamiglio R, Daliento L, Dalla Volta S. Ventricular fibrillation without apparent heart disease: Description of six cases. *American Heart Journal*. 1989;118:1203-1209.
46. Boudoulas H, Schaal SF, Stang JM, Fontana ME, Kolibash AJ, Wooley CF. Mitral valve prolapse: Cardiac arrest with long-term survival. *International Journal of Cardiology*. 1990;26:37-44.
47. Corrado D, Thiene G, Nava A, Rossi L, Pennelli N. Sudden death in young competitive athletes: Clinicopathologic correlations in 22 cases. *The American Journal of Medicine*. 1990;89:588-596.
48. Nelson-Piercy C, Rickards A, Yacoub M. Aberrant origin of the right coronary artery as a potential cause of sudden death: Successful anatomical correction. *Heart*. 1990;64:208-210.
49. Sadaniantz A, Thompson PD. The problem of sudden death in athletes as illustrated by case studies. *Sports Medicine*. 1990;9:199-204.
50. Dollar AL, Roberts WC. Morphologic comparison of patients with mitral valve prolapse who died suddenly with patients who died from severe valvular dysfunction or other conditions. *Journal of the American College of Cardiology*. 1991;17:921-931.
51. Vohra J, Sathe S, Warren R, Tatoulis J, Hunt D. Malignant ventricular arrhythmias in patients with mitral valve prolapse and mild mitral regurgitation. *Pacing Clin Electrophysiol*. 1993;16:387-393.

52. Martini B, Basso C, Thiene G. Sudden death in mitral valve prolapse with holter monitoring-documented ventricular fibrillation: Evidence of coexisting arrhythmogenic right ventricular cardiomyopathy. *International Journal of Cardiology*. 1995;49:274-278.
53. Moritz HA, Parnass SM, Mitchell JS. Ventricular fibrillation during anesthetic induction in a child with undiagnosed mitral valve prolapse. *Anesthesia & Analgesia*. 1997;85:59-61.
54. Wilde AA, Duren DR, Hauer RN, Bakker JM, Bakker PF, Becker AE, Janse MJ. Mitral valve prolapse and ventricular arrhythmias: Observations in a patient with a 20-year history. *Journal of Cardiovascular Electrophysiology*. 1997;8:307-316.
55. Ronneberger D, Hausmann R, Betz P. Sudden death associated with myxomatous transformation of the mitral valve in an 8-year-old boy. *International Journal of Legal Medicine*. 1998;111:199-201.
56. Nolte KB. Sudden cardiac death owing to pseudoxanthoma elasticum: A case report. *Human Pathology*. 2000;31:1002-1004.
57. Cannon ME, Cooke CT, McCarthy JS. Caffeine-induced cardiac arrhythmia: An unrecognised danger of healthfood products. *The Medical Journal of Australia*. 2001;174:520-521.
58. Abello M, Peinado R, Merino JL, Gnoatto M, Mateos M, Silvestre J, Dominguez JL. Cardioverter defibrillator implantation in a pregnant woman guided with transesophageal echocardiography. *Pacing and Clinical Electrophysiology*. 2003;26:1913-1914.
59. Ciancamerla F, Paglia I, Catuzzo B, Morello M, Mangiardi L. Sudden death in mitral valve prolapse and severe mitral regurgitation: Is chordal rupture an indication to early surgery? *Journal of Cardiovascular Surgery*. 2003;44:283-286.
60. Nishida N, Ikeda N, Esaki R, Kudo K, Tsuji A. Conduction system abnormalities in alcoholics with asymptomatic valvular disease who suffer sudden death. *Legal Medicine*. 2003;5:212-219.

61. Chirachariyavej T, Wohandee P, Peonim A. A report case of sudden cardiac death in a young adult male from northeastern part of thailand with mitral valve prolapse. *Journal of the Medical Association of Thailand*. 2004;87:446-449.
62. Frassati D, Tabib A, Lachaux B, Giloux N, Daléry J, Vittori F, Charvet D, Barel C, Bui-Xuan B, Mégard R, Jenoudet L-P, Descotes J, Vial T, Timour Q. Hidden cardiac lesions and psychotropic drugs as a possible cause of sudden death in psychiatric patients: A report of 14 cases and review of the literature. *The Canadian Journal of Psychiatry*. 2004;49:100-105.
63. Zeidan A, Baraka A. Ventricular fibrillation following atropine-neostigmine mixture in a patient with undiagnosed mitral valve prolapse. *Anaesthesia*. 2005;60:724-725.
64. Anders S, Said S, Schulz F, Puschel K. Mitral valve prolapse syndrome as cause of sudden death in young adults. *Forensic Sci Int*. 2007;171:127-130.
65. Kesavan S, James MA. Use of a defibrillation coil in the coronary sinus to reduce ventricular defibrillation threshold. *British Journal of Cardiology*. 2007;14:111-115.
66. Knackstedt C, Mischke K, Schimpf T, Neef P, Schauerte P. Ventricular fibrillation due to severe mitral valve prolapse. *Int J Cardiol*. 2007;116:e101-102.
67. Franchitto N, Bounes V, Telmon N, Rougé D. Mitral valve prolapse and out-of-hospital sudden death: A case report and literature review. *Medicine, Science and the Law*. 2010;50:164-167.
68. Oliveira M, Nave M, Gil N, Passos-Coelho J. Sudden death during adjuvant trastuzumab therapy of breast cancer. *Annals of Oncology*. 2010;21:901-a.
69. Rordorf R, Raineri C, De Ferrari GM, Via G, Tavazzi G, Mojoli F, Nicolino A, Landolina M. Post-partum cardiogenic shock in a patient with permanent junctional re-entry tachycardia. *International Journal of Cardiology*. 2011;151:e68-e70.
70. Abbadi DR, Purbey R, Poornima IG. Mitral valve repair is an effective treatment for ventricular arrhythmias in mitral valve prolapse syndrome. *International Journal of Cardiology*. 2014;177:e16-e18.

71. Rajani AR, Murugesan V, Baslaib FO, Rafiq MA. Mitral valve prolapse and electrolyte abnormality: A dangerous combination for ventricular arrhythmias. *BMJ case reports*. 2014;2014:bcr2014205055.
72. Lin L-T, Tsui K-H, Chang R, Cheng J-T, Huang B-S, Wang P-H. Management of recurrent and refractory ventricular tachycardia in pregnancy. *Taiwanese Journal of Obstetrics and Gynecology*. 2015;54:319-321.
73. Desai HM, Amonkar GP. Idiopathic mitral valve prolapse with tricuspid, aortic and pulmonary valve involvement: An autopsy case report. *Indian Journal of Pathology and Microbiology*. 2015;58:217.
74. Fais P, Vermiglio E, Laposata C, Lockwood R, Gottardo R, De Leo D. A case of sudden cardiac death following domperidone self-medication. *Forensic Science International*. 2015;254:e1-e3.
75. Ahmed M, Roshdy A, Sharma R, Fletcher N. Sudden cardiac arrest and coexisting mitral valve prolapse: A case report and literature review. *Echo Research and Practice*. 2016;3:D1-D8.
76. Vaidya VR, DeSimone CV, Damle N, Naksuk N, Syed FF, Ackerman MJ, Ponamgi SP, Nkomo VT, Suri RM, Noseworthy PA, Asirvatham SJ. Reduction in malignant ventricular arrhythmia and appropriate shocks following surgical correction of bileaflet mitral valve prolapse. *Journal of Interventional Cardiac Electrophysiology*. 2016;46:137-143.
77. Cacko A, Michalak M, Welk E, Opolski G, Grabowski M. Pre-hospital cardiac arrest treated successfully with automated external defibrillator. *Kardiologia Polska*. 2017;75:618-618.
78. Martini B, Zolla C, Guglielmi F, Toffanin GL, Cannas S, Martini N, Arancio R. Who is the guilty among these two silent killers? *Heart Rhythm Case Reports*. 2017;3:33-35.
79. Saha T, Norris R, Luebbert J. Recurrent premature ventricular contraction–induced ventricular fibrillation and resuscitated sudden death in a 26-year-old pregnant woman with bileaflet mitral valve prolapse. *Heart Rhythm Case Reports*. 2018;4:58-62.

80. Gaffney FA, Karlsson ES, Campbell W, Schutte JE, Nixon J, Willerson JT, Blomqvist CG. Autonomic dysfunction in women with mitral valve prolapse syndrome. *Circulation*. 1979;59:894-901.
81. Puddu PE, Pasternac A, Tubau JF, Król R, Farley L, de Champlain J. Qt interval prolongation and increased plasma catecholamine levels in patients with mitral valve prolapse. *American Heart Journal*. 1983;105:422-428.
82. Śnieżek-Maciejewska M, Dubiel J, Piwowarska W, Mroczek-Czernecka D, Mazurek S, Jaśkiewicz J, Kitliński M. Ventricular arrhythmias and the autonomic tone in patients with mitral valve prolapse. *Clinical Cardiology*. 1992;15:720-724.
83. Zuppiroli A, Mori F, Favilli S, Barchielli A, Corti G, Monteregeggi A, Dolara A. Arrhythmias in mitral valve prolapse: Relation to anterior mitral leaflet thickening, clinical variables, and color doppler echocardiographic parameters. *American Heart Journal*. 1994;128:919-927.
84. Babuty D, Cosnay P, Breuillac JC, Charniot JC, Delhomme C, Fauchier L, Fauchier JP. Ventricular arrhythmia factors in mitral valve prolapse. *Pacing and Clinical Electrophysiology*. 1994;17:1090-1099.
85. Naksuk N, Syed FF, Krittanawong C, Anderson MJ, Ebrille E, DeSimone CV, Vaidya VR, Ponamgi SP, Suri RM, Ackerman MJ, Nkomo VT, Asirvatham SJ, Noseworthy PA. The effect of mitral valve surgery on ventricular arrhythmia in patients with bileaflet mitral valve prolapse. *Indian Pacing and Electrophysiology Journal*. 2016;16:187-191.
86. Fulton BL, Liang JJ, Enriquez A, Garcia FC, Supple GE, Riley MP, Schaller RD, Dixit S, Callans DJ, Marchlinski FE, Han Y. Imaging characteristics of papillary muscle site of origin of ventricular arrhythmias in patients with mitral valve prolapse. *Journal of Cardiovascular Electrophysiology*. 2018;29:146-153.
87. Campbell R, Godman M, Fiddler G, Marquis R, Julian D. Ventricular arrhythmias in syndrome of balloon deformity of mitral valve. Definition of possible high risk group. *Heart*. 1976;38:1053-1057.

88. Bobkowski W, Siwińska A, Zachwieja J, Mroziński B, Rzeźnik-Bieniaszewska A, Maciejewski J. A prospective study to determine the significance of ventricular late potentials in children with mitral valvar prolapse. *Cardiology in the Young*. 2002;12:333-338.
89. Akcay M, Yuce M, Pala S, Akcakoyun M, Ergelen M, Kargin R, Emiroglu Y, Ozdemir N, Kaymaz C, Ozkan M. Anterior mitral valve length is associated with ventricular tachycardia in patients with classical mitral valve prolapse. *Pacing and Clinical Electrophysiology*. 2010;33:1224-1230.
90. Shah AA, Quinones MA, Waggoner AD, Barndt R, Miller RR. Pulsed doppler echocardiographic detection of mitral regurgitation in mitral valve prolapse: Correlation with cardiac arrhythmias. *Catheterization and Cardiovascular Interventions*. 1982;8:437-444.
91. Nishimura RA, McGoon MD, Shub C, Miller Jr FA, Ilstrup DM, Jamil Tajik A. Echocardiographically documented mitral-valve prolapse. *New England Journal of Medicine*. 1985;313:1305-1309.
92. Kligfield P, Hochreiter C, Kramer H, Devereux RB, Niles N, Kramer-Fox R, Borer JS. Complex arrhythmias in mitral regurgitation with and without mitral valve prolapse: Contrast to arrhythmias in mitral valve prolapse without mitral regurgitation. *The American Journal of Cardiology*. 1985;55:1545-1549.
93. Sanfilippo AJ, Abdollah H, Burggraf GW. Quantitation and significance of systolic mitral leaflet displacement in mitral valve prolapse. *American Journal of Cardiology*. 1989;64:1349-1355.
94. Zouridakis E, Parthenakis F, Kochiadakis G, Kanoupakis E, Vardas P. Qt dispersion in patients with mitral valve prolapse is related to the echocardiographic degree of the prolapse and mitral leaflet thickness. *Europace*. 2001;3:292-298.
95. Turker Y, Ozaydin M, Acar G, Ozgul M, Hoscan Y, Varol E, Dogan A, Erdogan D, Yucel H. Predictors of ventricular arrhythmias in patients with mitral valve prolapse. *Int J Cardiovasc Imaging*. 2010;26:139-145.

96. Carmo P, Andrade MJ, Aguiar C, Rodrigues R, Gouveia R, Silva JA. Mitral annular disjunction in myxomatous mitral valve disease: A relevant abnormality recognizable by transthoracic echocardiography. *Cardiovascular Ultrasound*. 2010;8:53.
97. Han Y, Peters DC, Salton CJ, Bzymek D, Nezafat R, Goddu B, Kissinger KV, Zimetbaum PJ, Manning WJ, Yeon SB. Cardiovascular magnetic resonance characterization of mitral valve prolapse. *JACC: Cardiovascular Imaging*. 2008;1:294-303.
98. Sriram CS, Syed FF, Ferguson ME, Johnson JN, Enriquez-Sarano M, Cetta F, Cannon BC, Asirvatham SJ, Ackerman MJ. Malignant bileaflet mitral valve prolapse syndrome in patients with otherwise idiopathic out-of-hospital cardiac arrest. *Journal of the American College of Cardiology*. 2013;62:222-230.
99. Basso C, Perrazolo Marra M, Rizzo S, De Lazzari M, Giorgi B, Cipriani A, Chiara Frigo A, Rigato I, Migliore F, Pilichou K, Bertaglia E, Cacciavillani L, Bauce B, Corrado D, Thiene G, Illiceto S. Arrhythmic mitral valve prolapse and sudden cardiac death. *Circulation*. 2015;132:556-566.
100. Nordhues BD, Siontis KC, Scott CG, Nkomo VT, Ackerman MJ, Asirvatham SJ, Noseworthy PA. Bileaflet mitral valve prolapse and risk of ventricular dysrhythmias and death. *Journal of Cardiovascular Electrophysiology*. 2016;27:463-468.
101. Bui AH, Roujol S, Foppa M, Kissinger KV, Goddu B, Hauser TH, Zimetbaum PJ, Ngo LH, Manning WJ, Nezafat R, Delling FN. Diffuse myocardial fibrosis in patients with mitral valve prolapse and ventricular arrhythmia. *Heart*. 2017;103:204-209.
